# Supplementary material
Source: MDPI journal article supplement (https://www.mdpi.com/2073-4395/11/1/166)
Supplement: s1 [file s1]

**Table S1.** Nutrient content (%) in different organic manures and application rate

| Year    | Crop  | Organic manures                | Nitrogen | Phosphorus | Potassium | Application rate (kg/ha) |
|---------|-------|--------------------------------|----------|------------|-----------|--------------------------|
| 2014-15 | Maize | Vermicompost                   | 1.56     | 0.51       | 1.07      | 3205                     |
|         |       | Farm yard manure               | 0.65     | 0.26       | 0.41      | 7692                     |
|         |       | <i>Brassicaceous</i> seed meal | 4.82     | 1.76       | 1.22      | 1037                     |
|         |       | Neem cake                      | 5.23     | 1.09       | 1.44      | 956                      |
| 2015    | Rice  | Vermicompost                   | 1.57     | 0.52       | 1.02      | 955                      |
|         |       | Farm yard manure               | 0.62     | 0.24       | 0.48      | 2419                     |
|         |       | <i>Brassicaceous</i> seed meal | 4.89     | 1.70       | 1.25      | 307                      |
|         |       | Neem cake                      | 5.30     | 1.11       | 1.33      | 283                      |
| 2015-16 | Maize | Vermicompost                   | 1.54     | 0.52       | 0.99      | 3247                     |
|         |       | Farm yard manure               | 0.59     | 0.25       | 0.43      | 8475                     |
|         |       | <i>Brassicaceous</i> seed meal | 4.80     | 1.77       | 1.21      | 1042                     |
|         |       | Neem cake                      | 5.18     | 1.07       | 1.43      | 965                      |
| 2016    | Rice  | Vermicompost                   | 1.59     | 0.54       | 1.02      | 943                      |
|         |       | Farm yard manure               | 0.66     | 0.22       | 0.40      | 2273                     |
|         |       | <i>Brassicaceous</i> seed meal | 4.90     | 1.81       | 1.15      | 306                      |
|         |       | Neem cake                      | 5.13     | 1.19       | 1.36      | 292                      |

**Table S2.** Energy calculation for maize production system/hectare (Based on mean data of two years)

| Farm operation                                        | Energy source                                                                                                            | Amount/Unit                        | Calculation                                                                                                                                                                                                                           | Energy input (MJ) |
|-------------------------------------------------------|--------------------------------------------------------------------------------------------------------------------------|------------------------------------|---------------------------------------------------------------------------------------------------------------------------------------------------------------------------------------------------------------------------------------|-------------------|
| Land preparation                                      | Ploughing by tractor along with cultivator                                                                               | 2 times × 1.25 hrs.<br>= 2.5 hrs.  | [Wt. of the tractor (kg) / Life span (hrs.)] × MJ × hours of operation = [2500 / 12000] × 64.80 × 2.5 = 33.75 MJ<br>[Wt. of the cultivator (kg) / Life span (hrs.)] × MJ × hours of operation = [400 / 6000] × 64.80 × 2.5 = 10.80 MJ | 44.55 MJ          |
|                                                       |                                                                                                                          | 1 times × 2.5 hrs. =<br>2.5 hrs.   | [Wt. of the tractor (kg) / Life span (hrs.)] × MJ × hours of operation = [2500 / 12000] × 64.80 × 2.5 = 33.75 MJ<br>[Wt. of the rotavator (kg) / Life span (hrs.)] × MJ × hours of operation = [400 / 4000] × 64.80 × 2.5 = 10.80 MJ  | 44.55 MJ          |
|                                                       | Levelling by tractor along with harrow                                                                                   | 1 times × 1.25 hrs.<br>= 1.25 hrs. | [Wt. of the tractor (kg) / Life span (hrs.)] × MJ × hours of operation = [2500 / 12000] × 64.80 × 1.25 = 16.87 MJ<br>[Wt. of the harrow (kg) / Life span (hrs.)] × MJ × hours of operation = [300 / 6000] × 64.80 × 1.25 = 4.05 MJ    | 20.92 MJ          |
|                                                       | Diesel consumption for tractor (4 L/hr.)                                                                                 | 6.25 hrs.                          | 6.25 × 4 × 56.31MJ = 1407.75 MJ                                                                                                                                                                                                       | 1407.75 MJ        |
|                                                       | Driver for tractor (Human)                                                                                               | 1 man 6.25 hrs.                    | 1 × 6.25 × 1.96 MJ = 12.25 MJ                                                                                                                                                                                                         | 12.25 MJ          |
|                                                       | Preparation of layout, bund, irrigation channel and dressing (according to the layout of experiment) and remove stubbles | 15 men for 6 hrs.                  | 15 × 6 × 1.96 MJ = 176.4 MJ                                                                                                                                                                                                           | 176.4 MJ          |
| Sowing                                                | Seed                                                                                                                     | 15 kg                              | 15 × 14.70 MJ = 220.5 MJ                                                                                                                                                                                                              | 220.5 MJ          |
|                                                       | Labour                                                                                                                   | 15 men for 8 hrs.                  | 15 × 8 × 1.96 MJ = 235.2 MJ                                                                                                                                                                                                           | 235.2 MJ          |
| Irrigation                                            | Water lifting pump (5 HP)                                                                                                | 5 times × 5 hrs. =<br>25 hrs.      | [Wt. of the engine (kg) / Life span (hrs.)] × MJ × hours of operation = [75 / 26280] × 64.80 × 25 = 4.62 MJ                                                                                                                           | 4.62 MJ           |
|                                                       | Diesel consumption for pump (4 L/hr.)                                                                                    | 25 hrs.                            | 25 × 4 × 56.31MJ = 5631 MJ                                                                                                                                                                                                            | 5631 MJ           |
|                                                       | Pump operator (human)                                                                                                    | 5 man for 5 hrs.                   | 5 × 5 × 1.96 MJ = 49 MJ                                                                                                                                                                                                               | 49 MJ             |
| Plant protection and surveillance                     | Insecticide                                                                                                              | 1 times × 0.675 L =<br>0.675 L     | 0.675 × 184.63 MJ = 124.63 MJ                                                                                                                                                                                                         | 124.63 MJ         |
|                                                       | Sprayer                                                                                                                  | Weight of the sprayer = 5.0 kg     | [Wt. of the sprayer (kg) / Life span (hrs.)] × MJ × hours of operation = [5.0 / 17520] × 62.70 × 16 MJ = 0.29 MJ                                                                                                                      | 0.29 MJ           |
|                                                       | Labour                                                                                                                   | 2 men for 8 hrs                    | 2 × 8 × 1.96 MJ = 31.36 MJ                                                                                                                                                                                                            | 31.36 MJ          |
| Harvesting (cob plucking and stalk cutting)           |                                                                                                                          | 30 men for 8 hrs                   | 30 × 8 × 1.96 MJ = 470.4 MJ                                                                                                                                                                                                           | 470.4 MJ          |
| Post-harvest operation (dehusking, shelling, storing) |                                                                                                                          | 38 men for 8 hrs                   | 38 × 8 × 1.96 MJ = 595.84 MJ                                                                                                                                                                                                          | 595.84 MJ         |
| <b>Total</b>                                          |                                                                                                                          |                                    |                                                                                                                                                                                                                                       | <b>9069.26 MJ</b> |

**Table S3.** Energy utilized through different nutrient and weed management practices in maize production system/hectare (Based on mean data of two years)

| Treatment                  | Urea                                       | SSP                                                                                                              | MOP                                           | Organic manure                                                                                              | Application                                                                                                                                                                                                                           | Total energy |
|----------------------------|--------------------------------------------|------------------------------------------------------------------------------------------------------------------|-----------------------------------------------|-------------------------------------------------------------------------------------------------------------|---------------------------------------------------------------------------------------------------------------------------------------------------------------------------------------------------------------------------------------|--------------|
| <i>Nutrient management</i> |                                            |                                                                                                                  |                                               |                                                                                                             |                                                                                                                                                                                                                                       |              |
| NM <sub>1</sub>            | 200 × 60.6 MJ<br>= 12120 MJ                | 60 × 11.1 MJ =<br>666 MJ                                                                                         | 60 × 6.7 MJ =<br>402 MJ                       | -                                                                                                           | Basal: 2 men for 6 hrs. 2 × 6 × 1.96 MJ = 23.52 MJ;<br>Top dressing (2 times): 4 men for 8 hrs. 4 × 8 × 1.96 MJ = 62.72 MJ;<br>Total = 86.24 MJ                                                                                       | 13274.24 MJ  |
| NM <sub>2</sub>            | 150 × 60.6 MJ<br>= 9090 MJ                 | 60 × 11.1 MJ =<br>666 MJ                                                                                         | 60 × 6.7 MJ =<br>402 MJ                       | 3326 × 0.60 × 0.3 MJ<br>= 598.68 MJ                                                                         | Basal (fertilizer): 2 men for 6 hrs. 2 × 6 × 1.96 MJ = 23.52 MJ;<br>Basal (Organic manure): 2 men for 6 hrs. 2 × 6 × 1.96 MJ = 23.52 MJ;<br>Top dressing (2 times): 4 men for 8 hrs. 4 × 8 × 1.96 MJ = 62.72 MJ;<br>Total = 109.76 MJ | 10866.44 MJ  |
| NM <sub>3</sub>            | -do-                                       | -do-                                                                                                             | -do-                                          | 8065 × 0.24 × 0.3 MJ<br>= 580.68 MJ                                                                         | -do-                                                                                                                                                                                                                                  | 10848.44 MJ  |
| NM <sub>4</sub>            | -do-                                       | -do-                                                                                                             | -do-                                          | 1040 × 0.89 × 0.3 MJ<br>= 277.68 MJ                                                                         | -do-                                                                                                                                                                                                                                  | 10545.44 MJ  |
| NM <sub>5</sub>            | -do-                                       | -do-                                                                                                             | -do-                                          | 961 × 0.90 × 0.3 MJ =<br>259.47 MJ                                                                          | -do-                                                                                                                                                                                                                                  | 10527.23 MJ  |
| <i>Weed management</i>     |                                            |                                                                                                                  |                                               |                                                                                                             |                                                                                                                                                                                                                                       |              |
| Treatment                  | Herbicide                                  | Application                                                                                                      |                                               | Mechanical weeding                                                                                          |                                                                                                                                                                                                                                       | Total energy |
|                            |                                            | Sprayer                                                                                                          | Labour                                        | Mechanical weeder                                                                                           | Operation                                                                                                                                                                                                                             |              |
| WM <sub>1</sub>            | -                                          | -                                                                                                                | -                                             | -                                                                                                           | -                                                                                                                                                                                                                                     | -            |
| WM <sub>2</sub>            | Atrazine:<br>2.0 × 254.45 MJ<br>= 508.9 MJ | [Wt. of the sprayer (kg) / Life span (hrs.)] × MJ × hours of operation = [5.0 / 17520] × 62.70 × 16 MJ = 0.29 MJ | Two men for 8 hrs. 2 × 8 × 1.96 MJ = 31.36 MJ | -                                                                                                           | -                                                                                                                                                                                                                                     | 550.55 MJ    |
| WM <sub>3</sub>            | -do-                                       | -do-                                                                                                             | -do-                                          | [Wt. of the weeded (kg) / Life span (hrs.)] × MJ × hours of operation = [4 / 11680] × 64.80 × 184 = 4.08 MJ | Twenty three men for 8 hrs. 23 × 8 × 1.96 MJ = 360.64 MJ                                                                                                                                                                              | 905.27 MJ    |

ATR 50 (Atrazine): 2.0 kg/ha; Moisture content (%): Vermicompost- 40; Farm Yard Manure- 76; Brassicaceous Seed Meal- 11; Neem cake- 10

**Table S4.** Energy calculation for greengram production system/hectare (Based on mean data of two years)

| Farm operation                              | Energy source                                                                                                            | Amount/Unit                    | Calculation                                                                                                        | Energy input (MJ) |
|---------------------------------------------|--------------------------------------------------------------------------------------------------------------------------|--------------------------------|--------------------------------------------------------------------------------------------------------------------|-------------------|
| Land preparation                            | Ploughing by power tiller                                                                                                | 3 times × 8 hrs. =<br>24 hrs.  | [Wt. of the power tiller (kg) / Life span (hrs.)] × MJ × hours of operation = [150 / 6000] × 64.80 × 24 = 38.88 MJ | 38.88 MJ          |
|                                             | Diesel consumption for power tiller (0.75 mL/hr.)                                                                        | 24 hrs.                        | 24 × 0.75 × 56.31MJ = 1013.58 MJ                                                                                   | 1013.58 MJ        |
|                                             | Driver for power tiller (Human)                                                                                          | 1 man 24 hrs.                  | 1 × 24 × 1.96 MJ = 47.04 MJ                                                                                        | 47.04 MJ          |
|                                             | Preparation of layout, bund, irrigation channel and dressing (according to the layout of experiment) and remove stubbles | 3 men for 8 hrs.               | 3 × 8 × 1.96 MJ = 47.04 MJ                                                                                         | 47.04 MJ          |
| Sowing                                      | Seed                                                                                                                     | 25 kg                          | 25 × 14.70 MJ = 367.5 MJ                                                                                           | 367.5 MJ          |
|                                             | Labour                                                                                                                   | 15 men for 8 hrs.              | 15 × 8 × 1.96 MJ = 235.2 MJ                                                                                        | 235.2 MJ          |
| Irrigation                                  | Water lifting pump (5 HP)                                                                                                | 2 times × 5 hrs. =<br>10 hrs.  | [Wt. of the engine (kg) / Life span (hrs.)] × MJ × hours of operation = [75 / 26280] × 64.80 × 10 = 1.85 MJ        | 1.85 MJ           |
|                                             | Diesel consumption for pump (4 L/hr.)                                                                                    | 10 hrs.                        | 10 × 4 × 56.31MJ = 2252.4 MJ                                                                                       | 2252.4 MJ         |
|                                             | Pump operator (human)                                                                                                    | 2 man for 5 hrs.               | 2 × 5 × 1.96 MJ = 19.6 MJ                                                                                          | 19.6 MJ           |
| Interculture operation                      | Thinning and gap filling                                                                                                 | 7 men for 10 hrs               | 7 × 10 × 1.96 MJ = 137.2 MJ                                                                                        | 137.2 MJ          |
| Plant protection and surveillance           | Insecticide                                                                                                              | 1 times × 0.15 L =<br>0.15 L   | 0.15 × 184.63 MJ = 27.69 MJ                                                                                        | 27.69 MJ          |
|                                             | Sprayer                                                                                                                  | Weight of the sprayer = 5.0 kg | [Wt. of the sprayer (kg) / Life span (hrs.)] × MJ × hours of operation = [5.0 / 17520] × 62.70 × 16 MJ = 0.29 MJ   | 0.29 MJ           |
|                                             | Labour                                                                                                                   | 2 men for 8 hrs                | 2 × 8 × 1.96 MJ = 31.36 MJ                                                                                         | 31.36 MJ          |
| Harvesting (pod plucking and stalk cutting) |                                                                                                                          | 30 men for 8 hrs               | 30 × 8 × 1.96 MJ = 470.4 MJ                                                                                        | 470.4 MJ          |
| Post harvest operation (threshing, storing) |                                                                                                                          | 23 men for 8 hrs               | 23 × 8 × 1.96 MJ = 360.64 MJ                                                                                       | 360.64 MJ         |
| <b>Total</b>                                |                                                                                                                          |                                |                                                                                                                    | <b>5050.67 MJ</b> |

**Table S5.** Energy utilized through different nutrient (residual) and weed management practices in greengram production system/hectare (Based on mean data of two years)

| Treatment              | Herbicide                                         | Application                                                                                                      |                                               | Mechanical weeding                                                                                          |                                                      | Total energy |
|------------------------|---------------------------------------------------|------------------------------------------------------------------------------------------------------------------|-----------------------------------------------|-------------------------------------------------------------------------------------------------------------|------------------------------------------------------|--------------|
|                        |                                                   | Sprayer                                                                                                          | Labour                                        | Mechanical weeder                                                                                           | Operation                                            |              |
| <i>Weed management</i> |                                                   |                                                                                                                  |                                               |                                                                                                             |                                                      |              |
| WM <sub>1</sub>        | -                                                 | -                                                                                                                | -                                             | -                                                                                                           | -                                                    | -            |
| WM <sub>2</sub>        | Imazethapyr:<br>1.00 × 254.45 MJ<br>= 254.45 MJ   | [Wt. of the sprayer (kg) / Life span (hrs.)] × MJ × hours of operation = [5.0 / 17520] × 62.70 × 16 MJ = 0.29 MJ | Two men for 8 hrs. 2 × 8 × 1.96 MJ = 31.36 MJ | -                                                                                                           | -                                                    | 286.1 MJ     |
| WM <sub>3</sub>        | Pendimethalin:<br>3.33 × 254.45 MJ<br>= 847.32 MJ | -do-                                                                                                             | -do-                                          | [Wt. of the weeded (kg) / Life span (hrs.)] × MJ × hours of operation = [4 / 11680] × 64.80 × 240 = 5.33 MJ | Thirty men for 8 hrs.<br>30 × 8 × 1.96 MJ = 470.4 MJ | 1354.7 MJ    |

Depend (Pendimethalin): 3.33 kg/ha; Weed Block (Imazethapyr): 1.00 kg/ha

**Table S6.** Energy calculation for rice production system/hectare (Based on mean data of two years)

| Farm operation                                | Energy source                                                                                                            | Amount/Unit                    | Calculation                                                                                                        | Energy input (MJ) |
|-----------------------------------------------|--------------------------------------------------------------------------------------------------------------------------|--------------------------------|--------------------------------------------------------------------------------------------------------------------|-------------------|
| <i>Raising of seedling in the nursery bed</i> |                                                                                                                          |                                |                                                                                                                    |                   |
| Land preparation                              | Ploughing by power tiller                                                                                                | 1 times × 2 hrs. = 2 hrs.      | [Wt. of the power tiller (kg) / Life span (hrs.)] × MJ × hours of operation = [150 / 6000] × 64.80 × 2 = 3.24 MJ   | 3.24 MJ           |
|                                               | Diesel consumption for power tiller (0.75 mL/hr.)                                                                        | 2 hrs.                         | 2 × 0.75 × 56.31MJ = 84.47 MJ                                                                                      | 84.47 MJ          |
|                                               | Driver for power tiller (Human)                                                                                          | 1 man 2 hrs.                   | 1 × 2 × 1.96 MJ = 3.92 MJ                                                                                          | 3.92 MJ           |
|                                               | Cleaning the stubbles and raise the seed bed                                                                             | 2 man 8 hrs.                   | Men = 2 × 8 × 1.96 MJ = 31.36 MJ                                                                                   | 31.36 MJ          |
| Fertilizer in seed bed                        | N                                                                                                                        | 10 kg                          | = 10 × 60.60 MJ = 606.00 MJ                                                                                        | 606.00 MJ         |
|                                               | P <sub>2</sub> O <sub>5</sub>                                                                                            | 2 kg                           | = 2 × 11.1 MJ = 22.20 MJ                                                                                           | 22.20 MJ          |
|                                               | K <sub>2</sub> O                                                                                                         | 2 kg                           | = 2 × 6.7 MJ = 13.40 MJ                                                                                            | 13.40 MJ          |
|                                               | Application                                                                                                              | 1 man 3 hrs.                   | Men = 1 × 3 × 1.96 MJ = 6.88 MJ                                                                                    | 6.88 MJ           |
| Sowing                                        | Seed                                                                                                                     | 50 kg                          | 50 × 14.70 MJ = 735 MJ                                                                                             | 735 MJ            |
|                                               | Sowing                                                                                                                   | 1 man 6 hrs.                   | Men = 1 × 6 × 1.96 MJ = 11.76 MJ                                                                                   | 11.76 MJ          |
| Irrigation                                    | Water lifting pump (5 HP)                                                                                                | 2 times × 2 hrs. = 4 hrs.      | [Wt. of the engine (kg) / Life span (hrs.)] × MJ × hours of operation = [75 / 26280] × 64.80 × 4 = 0.74 MJ         | 0.74 MJ           |
|                                               | Diesel consumption for pump (4 L/hr.)                                                                                    | 4 hrs.                         | 4 × 4 × 56.31MJ = 901 MJ                                                                                           | 901 MJ            |
|                                               | Pump operator (human)                                                                                                    | 2 man for 2 hrs.               | 2 × 2 × 1.96 MJ = 7.84 MJ                                                                                          | 7.84 MJ           |
| <i>Main field operation</i>                   |                                                                                                                          |                                |                                                                                                                    |                   |
| Land preparation                              | Ploughing by power tiller                                                                                                | 4 times × 8 hrs. = 32 hrs.     | [Wt. of the power tiller (kg) / Life span (hrs.)] × MJ × hours of operation = [150 / 6000] × 64.80 × 32 = 51.84 MJ | 51.84 MJ          |
|                                               | Levelling by bullocks                                                                                                    | 1 pair for 16 hrs.             | 16 × 1 × 10.1MJ = 161.6 MJ                                                                                         | 161.6 MJ          |
|                                               | Diesel consumption for power tiller (0.75 mL/hr.)                                                                        | 32 hrs.                        | 32 × 0.75 × 56.31MJ = 1351.44 MJ                                                                                   | 1351.44 MJ        |
| Farm operation                                | Driver for power tiller (Human)                                                                                          | 1 man 32 hrs.                  | 1 × 32 × 1.96 MJ = 62.72 MJ                                                                                        | 62.72 MJ          |
|                                               | Human                                                                                                                    | 1 man 16 hrs.                  | Men = 1 × 16 × 1.96 MJ = 31.36 MJ                                                                                  | 31.36 MJ          |
|                                               | Preparation of layout, bund, irrigation channel and dressing (according to the layout of experiment) and remove stubbles | 15 men for 6 hrs.              | 15 × 6 × 1.96 MJ = 176.4 MJ                                                                                        | 176.4 MJ          |
| Transplanting                                 | Labour                                                                                                                   | 30 women for 6 hrs.            | 30 × 6 × 1.57 MJ = 282.6 MJ                                                                                        | 282.6 MJ          |
| Irrigation                                    | Water lifting pump (5 HP)                                                                                                | 2 times × 5 hrs. = 10 hrs.     | [Wt. of the engine (kg) / Life span (hrs.)] × MJ × hours of operation = [75 / 26280] × 64.80 × 10 = 1.85 MJ        | 1.85 MJ           |
|                                               | Diesel consumption for pump (4 L/hr.)                                                                                    | 10 hrs.                        | 10 × 4 × 56.31MJ = 2252.4 MJ                                                                                       | 2252.4 MJ         |
|                                               | Pump operator (human)                                                                                                    | 2 man for 5 hrs.               | 2 × 5 × 1.96 MJ = 19.6 MJ                                                                                          | 19.6 MJ           |
| Plant protection and surveillance             | Insecticide                                                                                                              | 1 times × 0.675 L = 0.675 L    | 0.675 × 184.63 MJ = 124.63 MJ                                                                                      | 124.63 MJ         |
|                                               | Sprayer                                                                                                                  | Weight of the sprayer = 5.0 kg | [Wt. of the sprayer (kg) / Life span (hrs.)] × MJ × hours of operation = [5.0 / 17520] × 62.70 × 16 MJ = 0.29 MJ   | 0.29 MJ           |
|                                               | Labour                                                                                                                   | 2 men for 8 hrs                | 2 × 8 × 1.96 MJ = 31.36 MJ                                                                                         | 31.36 MJ          |
| Harvesting                                    | Labour                                                                                                                   | 23 men for 8 hrs               | 23 × 8 × 1.96 MJ = 360.64 MJ                                                                                       | 360.64 MJ         |
| Post harvest operation (threshing, storing)   | Labour                                                                                                                   | 23 men for 8 hrs               | 23 × 8 × 1.96 MJ = 360.64 MJ                                                                                       | 360.64 MJ         |
| <b>Total</b>                                  |                                                                                                                          |                                |                                                                                                                    | <b>7697.18 MJ</b> |

**Table S7.** Energy utilized through different nutrient and weed management practices in rice production system/hectare (Based on mean data of two years)

| Treatment                  | Urea                                                                                                                                     | SSP                                                                                                                          | MOP                                                 | Organic manure                                                                                                    | Application                                                                                                                                                                                                                        | Total energy  |
|----------------------------|------------------------------------------------------------------------------------------------------------------------------------------|------------------------------------------------------------------------------------------------------------------------------|-----------------------------------------------------|-------------------------------------------------------------------------------------------------------------------|------------------------------------------------------------------------------------------------------------------------------------------------------------------------------------------------------------------------------------|---------------|
| <i>Nutrient management</i> |                                                                                                                                          |                                                                                                                              |                                                     |                                                                                                                   |                                                                                                                                                                                                                                    |               |
| NM <sub>1</sub>            | 60 × 60.6 MJ =<br>3636 MJ                                                                                                                | 30 × 11.1 MJ =<br>333 MJ                                                                                                     | 30 × 6.7 MJ =<br>201 MJ                             | –                                                                                                                 | Basal: 2 men for 6 hrs. 2 × 6 × 1.96 MJ = 23.52 MJ;<br>Top dressing (2 times): 4 men for 8 hrs. 4 × 8 × 1.96 MJ = 62.72 MJ; Total = 86.24 MJ                                                                                       | 4256.24 MJ    |
| NM <sub>2</sub>            | 45 × 60.6 MJ =<br>2727 MJ                                                                                                                | 30 × 11.1 MJ =<br>333 MJ                                                                                                     | 30 × 6.7 MJ =<br>201 MJ                             | 950 × 0.60 × 0.3 MJ =<br>171 MJ                                                                                   | Basal (fertilizer): 2 men for 6 hrs. 2 × 6 × 1.96 MJ = 23.52 MJ;<br>Basal (Organic manure): 2 men for 6 hrs. 2 × 6 × 1.96 MJ = 23.52 MJ;<br>Top dressing (2 times): 4 men for 8 hrs. 4 × 8 × 1.96 MJ = 62.72 MJ; Total = 109.76 MJ | 3541.76 MJ    |
| NM <sub>3</sub>            | –do–                                                                                                                                     | –do–                                                                                                                         | –do–                                                | 2344 × 0.24 × 0.3 MJ =<br>168.77 MJ                                                                               | –do–                                                                                                                                                                                                                               | 3539.53 MJ    |
| NM <sub>4</sub>            | –do–                                                                                                                                     | –do–                                                                                                                         | –do–                                                | 307 × 0.89 × 0.3 MJ =<br>81.97 MJ                                                                                 | –do–                                                                                                                                                                                                                               | 3452.73 MJ    |
| NM <sub>5</sub>            | –do–                                                                                                                                     | –do–                                                                                                                         | –do–                                                | 288 × 0.90 × 0.3 MJ =<br>77.76 MJ                                                                                 | –do–                                                                                                                                                                                                                               | 3448.52 MJ    |
| Treatment                  | Herbicide                                                                                                                                | Application                                                                                                                  |                                                     | Mechanical weeding                                                                                                |                                                                                                                                                                                                                                    | Total energy  |
|                            |                                                                                                                                          | Sprayer                                                                                                                      | Labour                                              | Mechanical weeder                                                                                                 | Operation                                                                                                                                                                                                                          |               |
| <i>Weed management</i>     |                                                                                                                                          |                                                                                                                              |                                                     |                                                                                                                   |                                                                                                                                                                                                                                    |               |
| WM <sub>1</sub>            | –                                                                                                                                        | –                                                                                                                            | –                                                   | –                                                                                                                 | –                                                                                                                                                                                                                                  | –             |
| WM <sub>2</sub>            | Bispyribac-Na:<br>0.25 × 254.45 MJ = 63.61 MJ<br>Metsulfuron methyl + chlorimuron ethyl:<br>0.02 × 254.45 MJ = 5.09 MJ<br>Total: 68.7 MJ | [Wt. of the sprayer (kg) /<br>Life span (hrs.)] × MJ ×<br>hours of operation = [5.0 /<br>17520] × 62.70 × 16 MJ = 0.29<br>MJ | Two men for 8<br>hrs. 2 × 8 × 1.96<br>MJ = 31.36 MJ | –                                                                                                                 | –                                                                                                                                                                                                                                  | 100.35<br>MJ  |
| WM <sub>3</sub>            | Bensulfuron methyl + pretilachlor:<br>10 × 254.45 MJ = 2544.5 MJ                                                                         | –                                                                                                                            | One man for 8<br>hrs. 1 × 8 × 1.96<br>MJ = 15.68 MJ | [Wt. of the weeded (kg) / Life span<br>(hrs.)] × MJ × hours of operation =<br>[6 / 11680] × 64.80 × 240 = 7.99 MJ | Thirty men for 8<br>hrs. 30 × 8 × 1.96<br>MJ = 470.4 MJ                                                                                                                                                                            | 3038.57<br>MJ |

Moisture content (%): Vermicompost- 40; Farm Yard Manure- 76; Brassicaceous Seed Meal- 11; Neem cake- 10

Nominee Gold (Bispyribac-Na): 250 mL/ha; Almix (Metsulfuron methyl + chlorimuron ethyl): 20 g/ha; Erase Strong (Bensulfuron methyl + pretilachlor): 10 kg/ha
